# Supplementary material
Source: Springer Nature journal article supplement (https://www.springermedizin.de/resource/supplementary/12936_2010_1366_MOESM3_ESM.pdf/9549612)
Supplement: MOESM3 [file 9549612]

| Journal                | Impact Factor<br>(2009) | Nb malaria papers<br>(2009) |
|------------------------|-------------------------|-----------------------------|
| NEJM                   | 47                      | 6                           |
| Nature *               | 34                      | 7                           |
| Cell                   | 31                      | 0                           |
| Lancet                 | 30                      | 28                          |
| Science                | 29                      | 7                           |
| J Exp Med              | 14                      | 1                           |
| PLos Medicine**        | 13                      | 15                          |
| BMJ                    | 11                      | 18                          |
| Proc Natl Acad Sci USA | 9                       | 14                          |
| J Biol Chem            | 5.6                     | 18                          |

\* Total of malaria papers for all 'Nature journals' : 18

\*\* Total of malaria papers for all 'PLOS journals': 160
